# Supplementary material for: Chromosomal contacts connect loci associated with autism, BMI and head circumference phenotypes
Source: PubMed Central journal article supplement — Mol Psychiatry. 2016 May 31;22(6):836–49. doi: 10.1038/mp.2016.84 (PMC5508252; doi:10.1038/mp.2016.84), 2016-05-31
Supplement: mp201684x1.pdf [file mp201684x1.pdf]

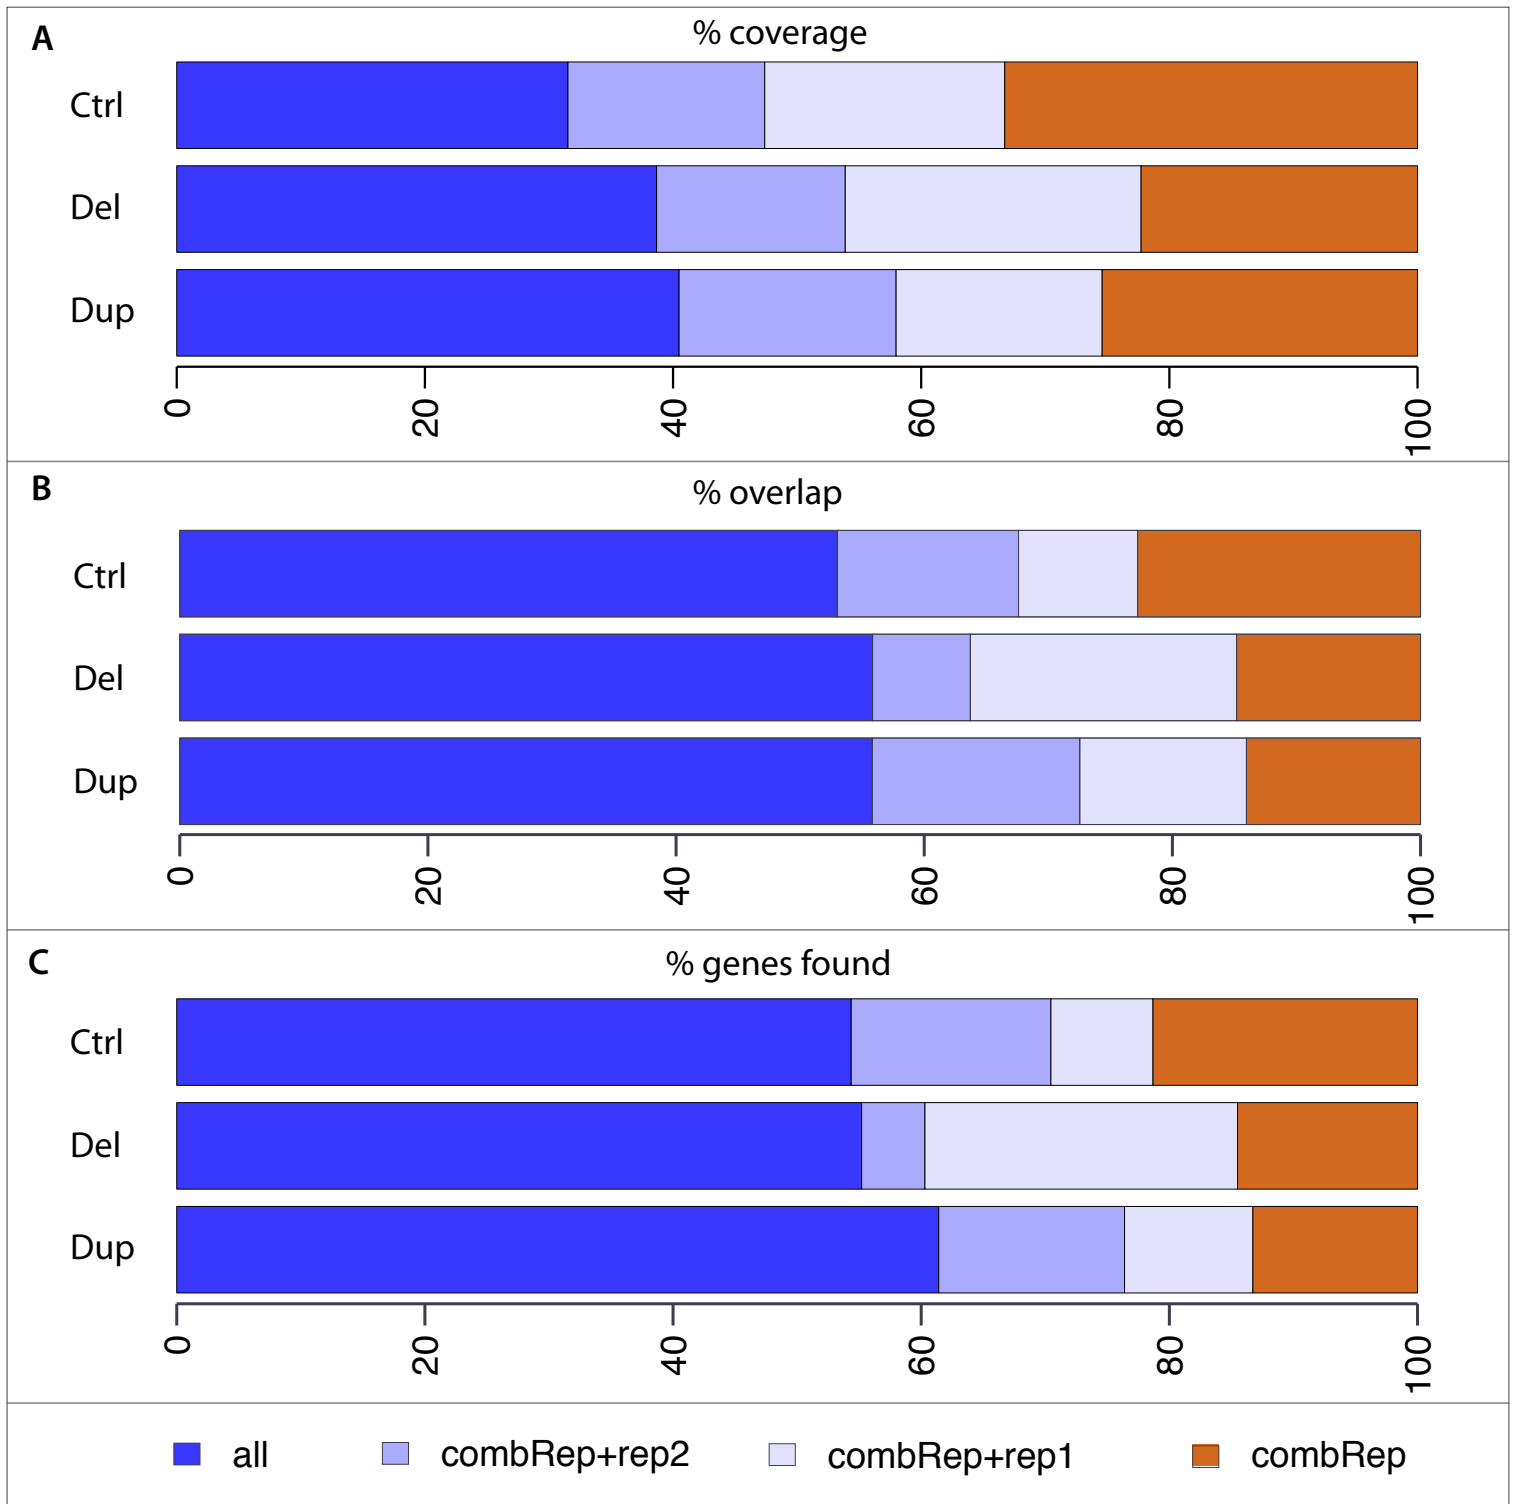

**Figure S1: Comparison of 4C-seq replicates**

BRICKS obtained after averaging replicates (combRep) are compared to BRICKS found in each replicate separately (rep1 and rep2) according to **(A)** percentage of the total length of combRep BRICKS also included in the intersection of rep1 and rep2 BRICKS, in only one of the replicates or in none; **(B)** percentage of the combRep BRICKS that overlap with the intersection of rep1 and rep2 BRICKS, with only one of the replicates or with neither; and **(C)** percentage of genes found within combRep BRICKS that are also found in the intersection of rep1 and rep2 BRICKS, in only one of the replicates or in none.

chr16

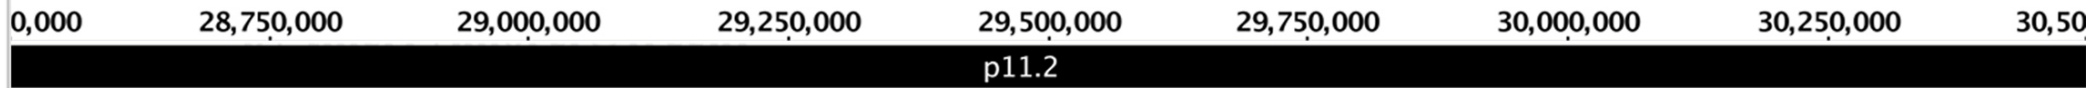

transcripts

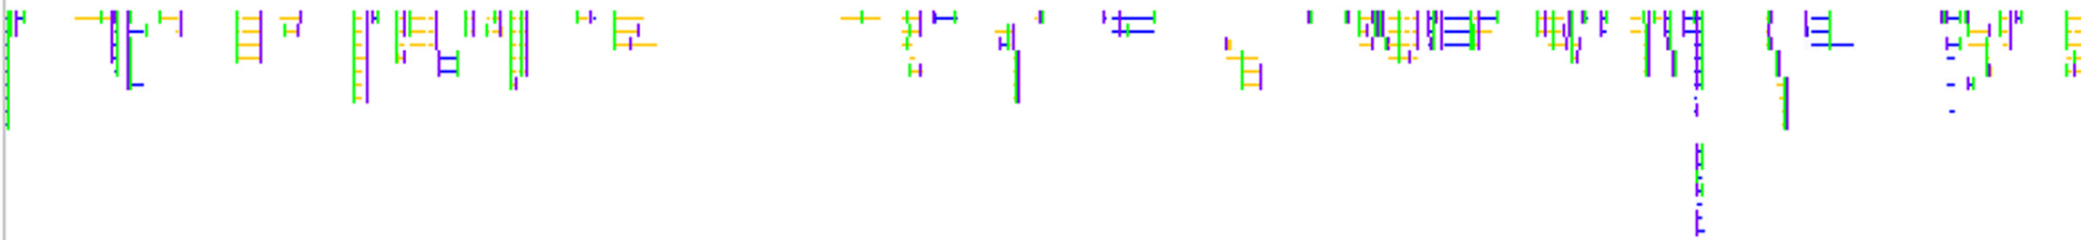

Viewpoints

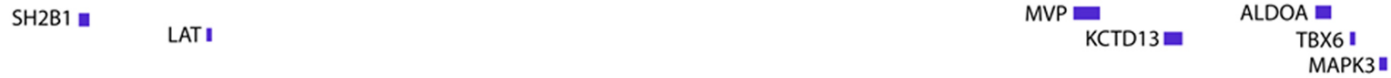

CNVs

distal\_220kb\_region

proximal\_600kb\_region

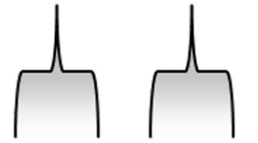

**SH2B1**

Common variants associated with **BMI, serum leptin and body fat** in GWAS

**LAT**

Adaptor molecule participating in **AKT activation**

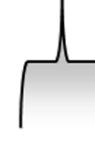

**MVP**

Epistatic effect on **zebrafish head size** with **KCTD13**

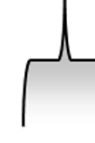

**ALDOA**

Dosage sensitive gene affecting **brain morphology** in zebrafish

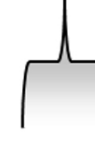

**MAPK3**

Epistatic effect on **zebrafish head size** with **KCTD13**

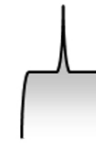

**KCTD13**

Dosage sensitive driver of **micro/macrocephaly phenotypes** in zebrafish

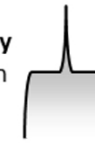

**TBX6**

Candidate gene for the **vertebral malformations**

10/2020/01/2011

**Figure S2: Selection of 4C viewpoints**

Function and mapping position of the genes selected as viewpoints for 4C-seq analysis.



## Interactions with equidistant regions

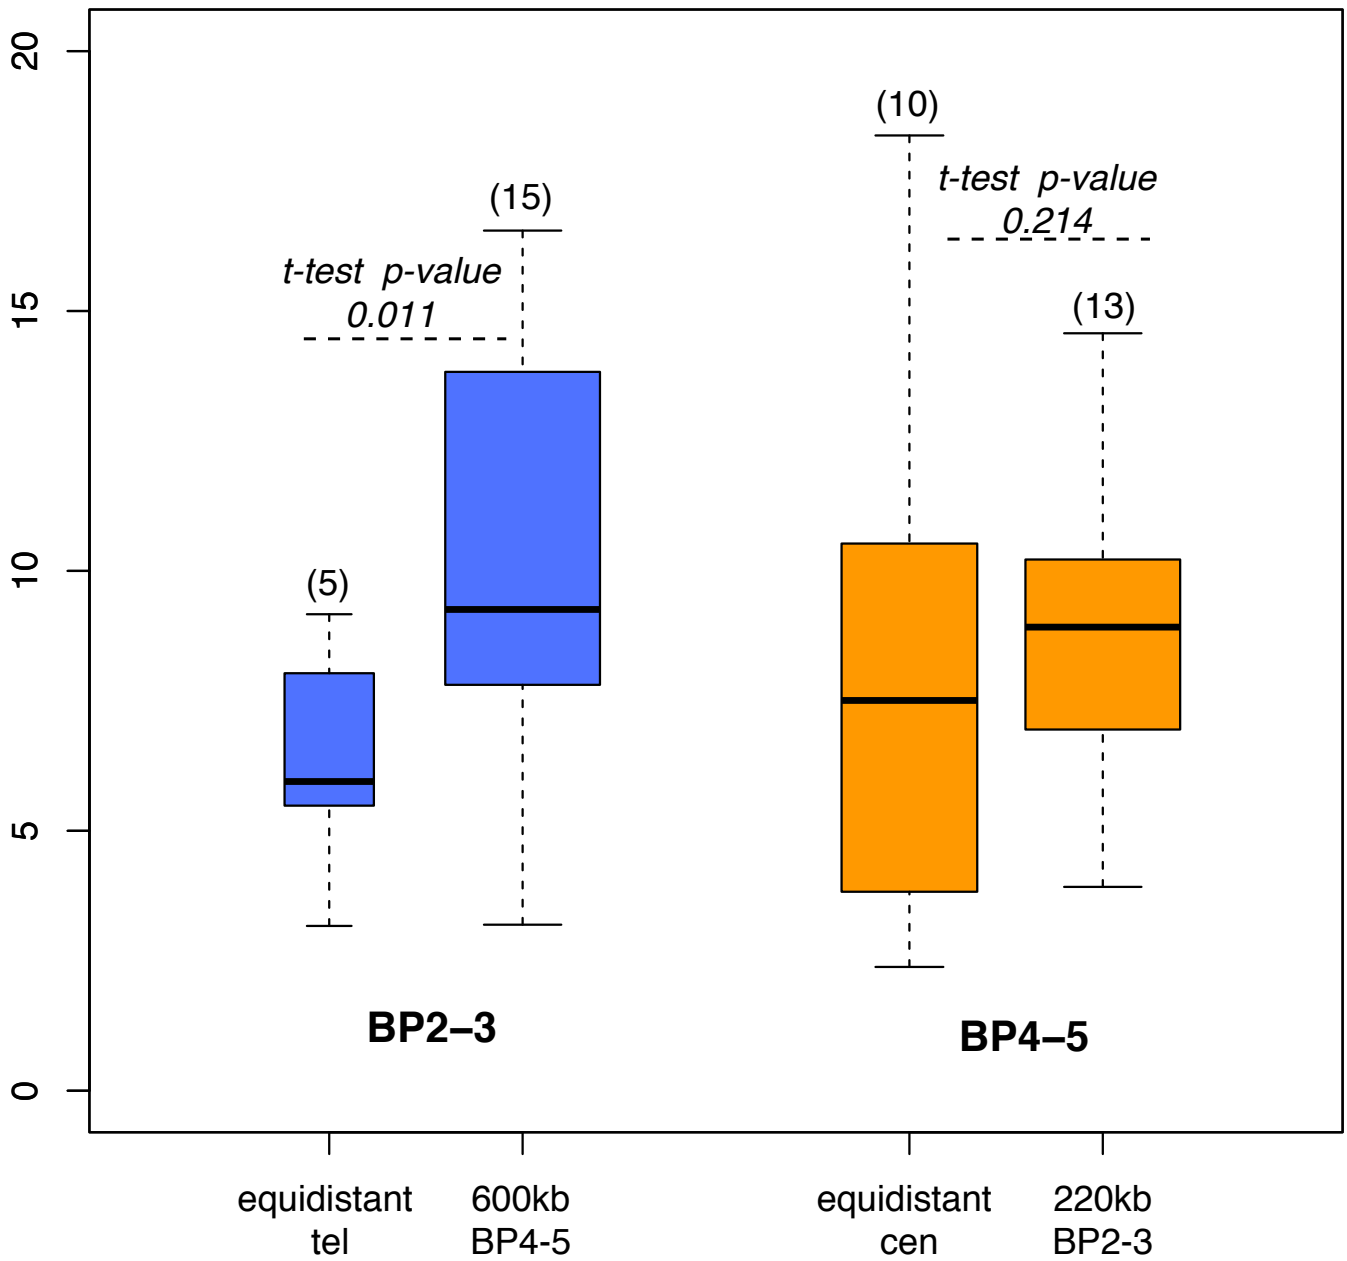

**Figure S3: The 220kb BP2-3 viewpoints display preferential interactions with the BP4-BP5 region compared with the telomeric equidistant region**

Significances of BRICKS identified with viewpoints mapping within the 220kb BP2-BP3 region and mapping within the 600kb BP4-BP5 interval (right blue boxplot) compared with those in the equidistant, same lengths and telomeric region (left blue boxplot). Significances of BRICKS identified with viewpoints mapping within the 600kb BP4-BP5 region and mapping within the 220kb BP2-BP3 interval (right orange boxplot) compared with those in the equidistant, same lengths and centromeric region (left orange boxplot). The number of BRICKs is indicated in brackets and p-values of a one-sided t-test (alternative "less") are reported above each comparison.

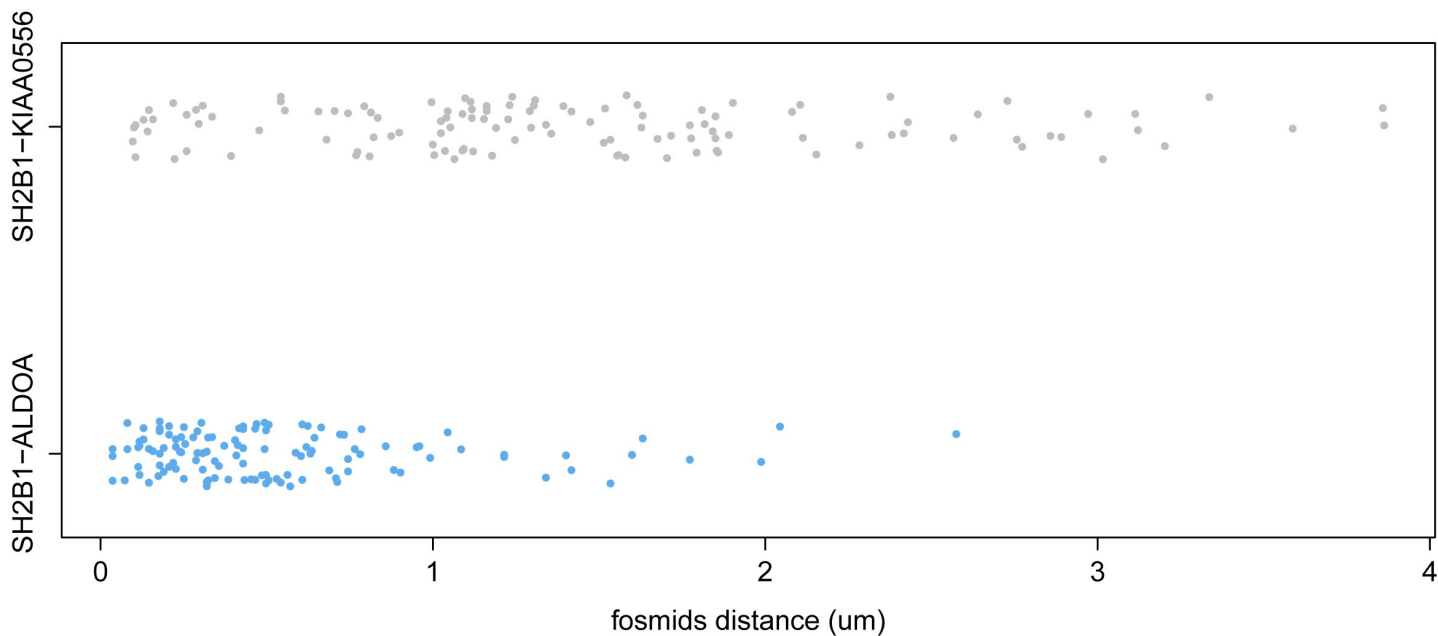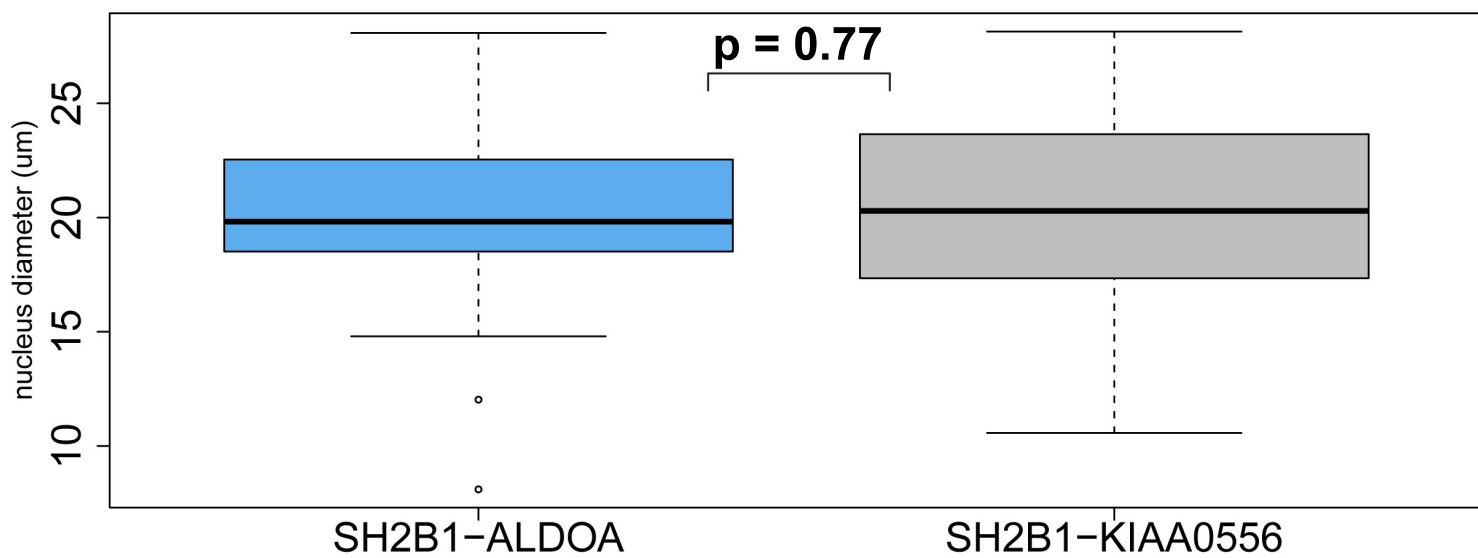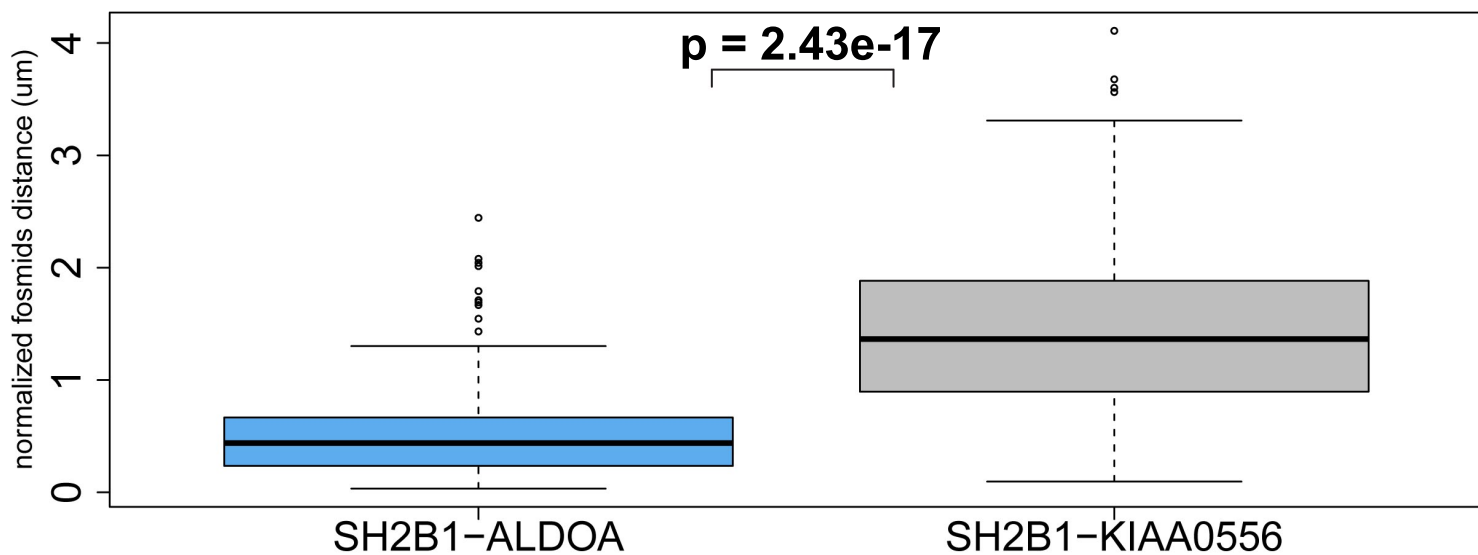

**Figure S4: FISH shows co-localization of the 220kb and 600kb intervals**

Fluorescence *in situ* hybridization experiments show co-localization of *SH2B1* that maps to the 220 kb interval with *ALDOA* that map to the 600kb interval but not with the equidistant *KIAA0556* locus. **(A)** Distribution of interphase nuclei foci distances *SH2B1-ALDOA* (light blue) and *SH2B1-KIAA0556* (grey)(n=120 for each experiment). **(B)** Distribution of the measured nucleus diameters in the *SH2B1-ALDOA* (light blue) and *SH2B1-KIAA0556* experiments (grey)(n=60 nuclei). **(C)** Distribution of interphase nuclei foci distances *SH2B1-ALDOA* (light blue) and *SH2B1-KIAA0556* (grey) normalized by the nucleus diameter (n=120 for each experiment).

FDR 5%

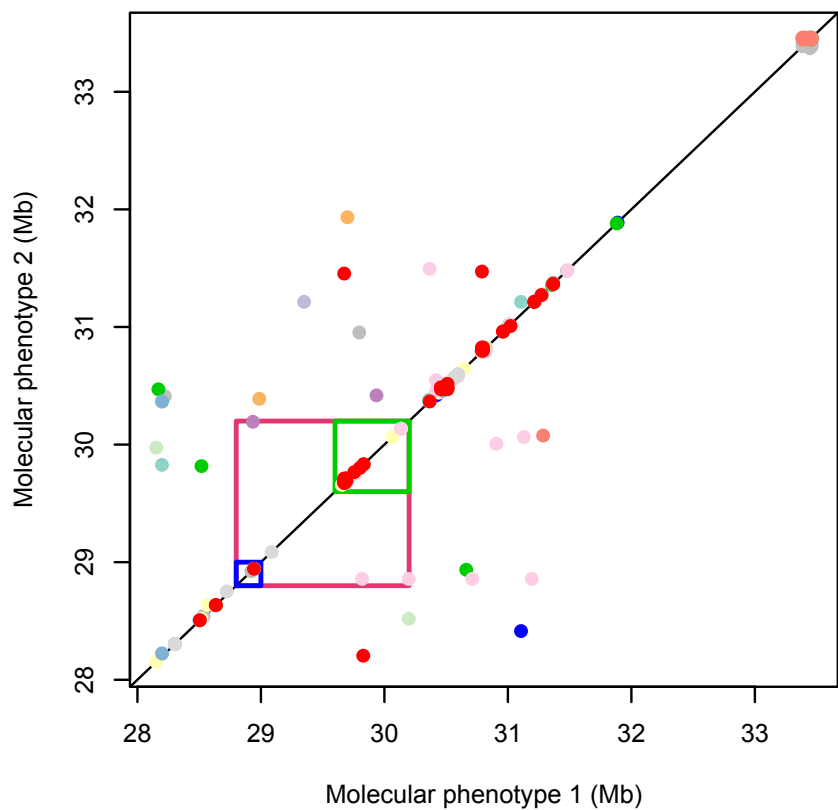

FDR 10%

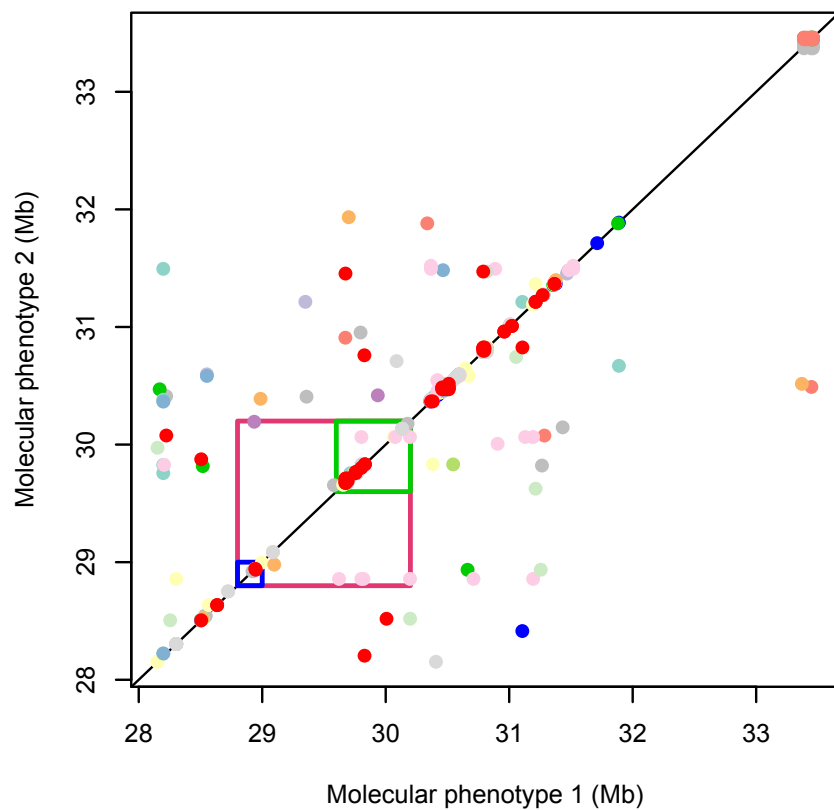

- H3K27ac-H3K4me1
- H3K27ac-H3K4me3
- H3K27ac-PU.11
- H3K27ac-mRNA
- H3K27ac-RPB2
- H3K4me1-H3K4me3
- H3K4me1-PU.1
- H3K4me1-mRNA
- H3K4me1-RPB2
- H3K4me3-PU.1
- H3K4me3-mRNA
- H3K4me3-RPB2
- PU.1-mRNA
- PU.1-RPB2
- mRNA-RPB2

**Figure S5: Associations between molecular phenotypes within the 16p11.2 cytoband**

Pairwise molecular associations within the 16p11.2 region (28.1-34.6 Mb) between H3K4me1, H3K4me3, H3K27ac, PU.1 and RPB2 binding and mRNA levels in LCLs of 47 unrelated individuals at 5% (left panel) and 10% FDR (right panel). The positions of the 220kb BP2-BP3 and 600kb BP4-BP5 intervals are delimited by blue and green rectangles, respectively. Associations that support the 4C observed loopings between the 16p11.2 600kb BP4-BP5 and BP2-BP3 intervals are enclosed in the red rectangle. The nature of the molecular phenotypes participating in the associations is indicated on the right.

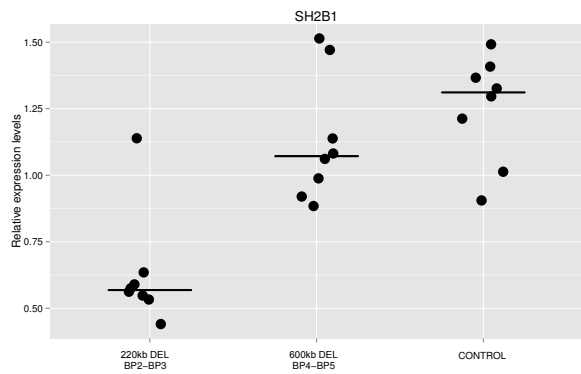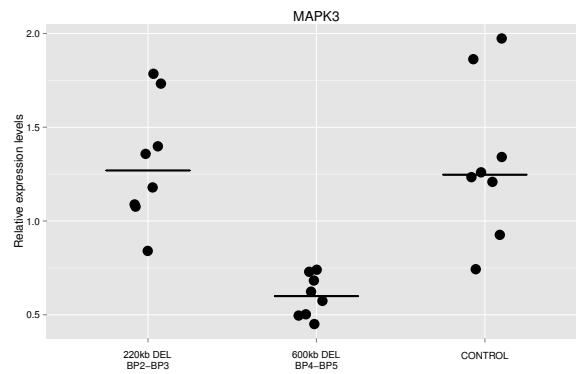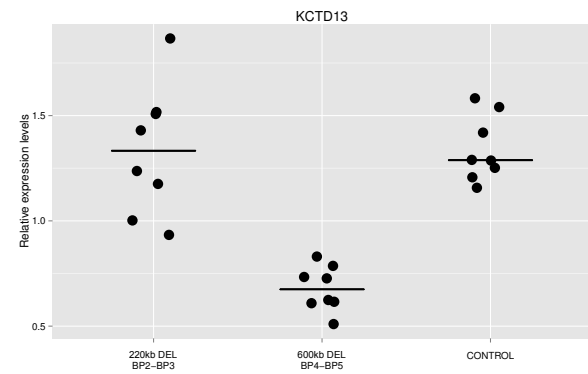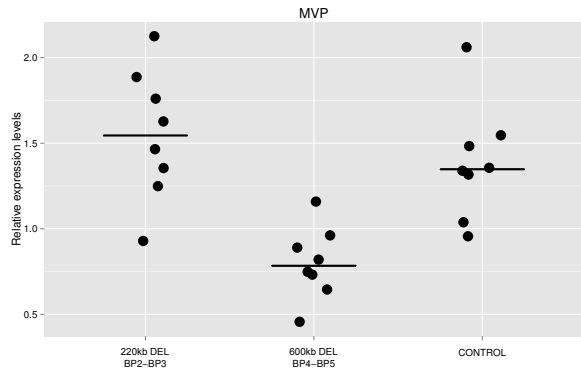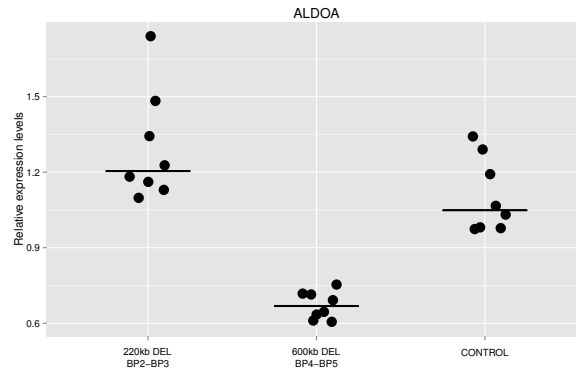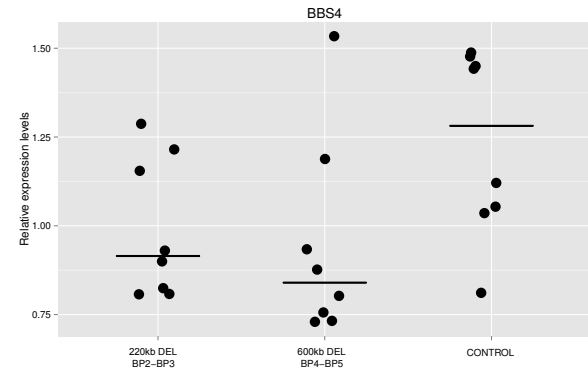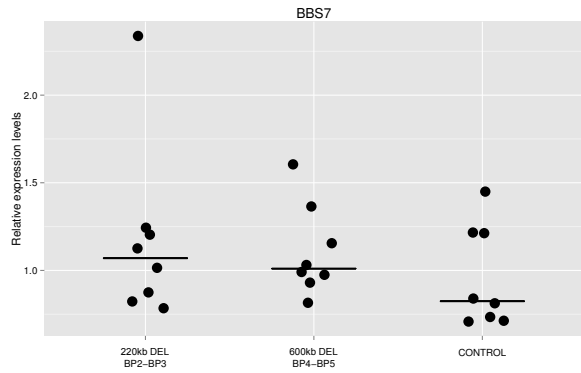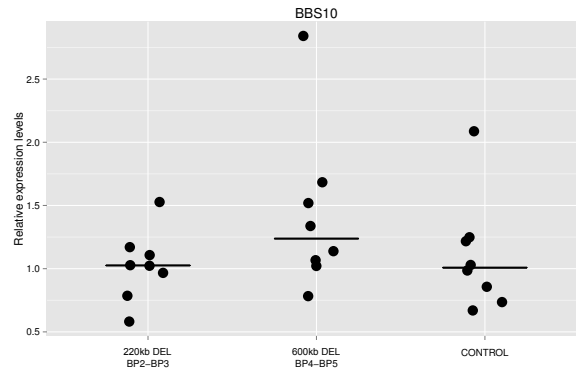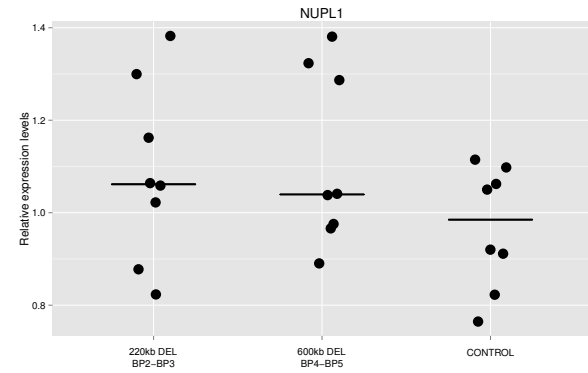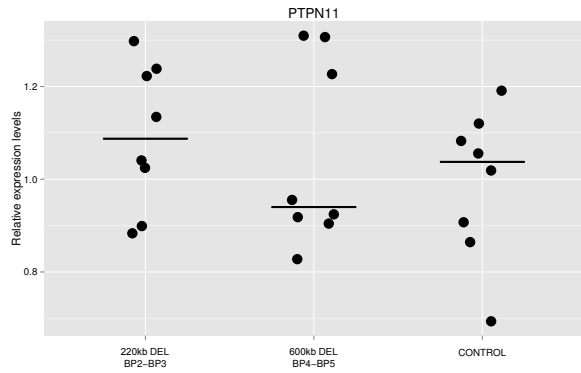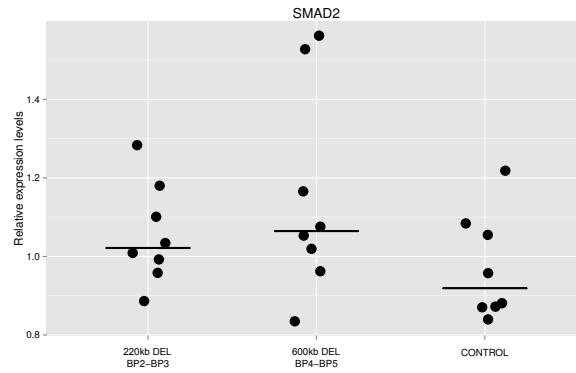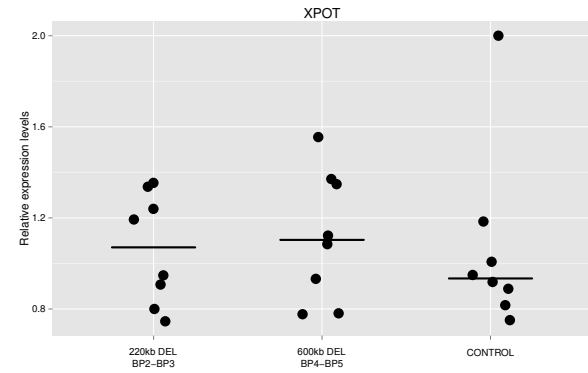

**Figure S6: Ciliopathy gene expression levels are modified in cells of both 16p11.2 600kb BP4-BP5 and 16p11.2 BP2-BP3 deletion carriers.** RNA levels of genes involved in primary cilium function and related pathways are modified in both 600kb BP4-BP5 and 220kb BP2-BP3 deletion patients' cells. Relative expression levels measured by quantitative PCR of BBS4, BBS7, BBS10, PTPN11, SMAD2, XPOT, NUP58 (a.k.a NUPL1), as well as 16p11.2 imbalanced interval genes ALDOA, KCTD13, MAPK3, MVP and SH2B1 in LCLs of eight unrelated carriers of the 220kb BP2-BP3 deletion, eight unrelated carriers of the 600kb BP4-BP5 deletion and eight unrelated age- and sex-matched control individuals (CONTROL). Note the significant diminution of the hemizygote gene SH2B1, but not of the neighboring normal-copy ALDOA, KCTD13, MVP and MAPK3 in 220kb deletion carriers and the reciprocal diminutions of the hemizygote ALDOA, KCTD13, MVP and MAPK3 but not of the neighboring normal-copy SH2B1 in 600 kb deletion carriers. The bar indicates the median.



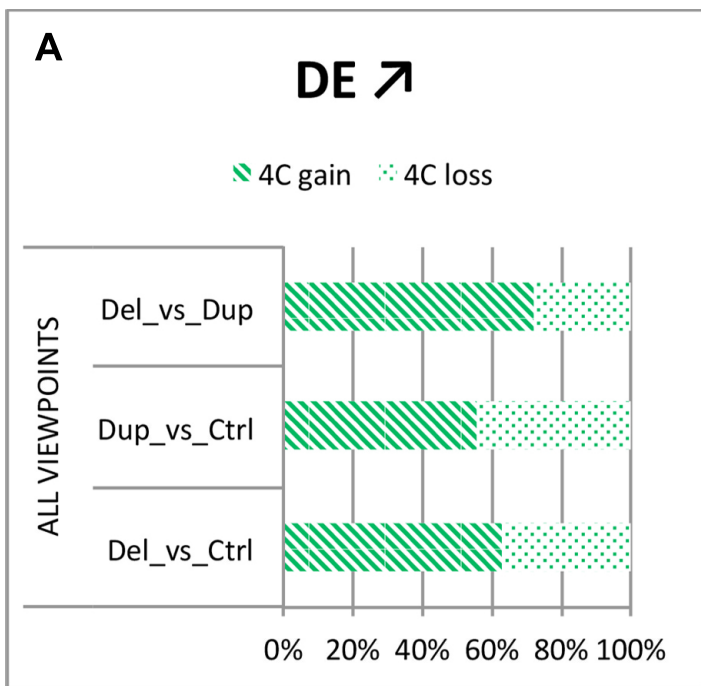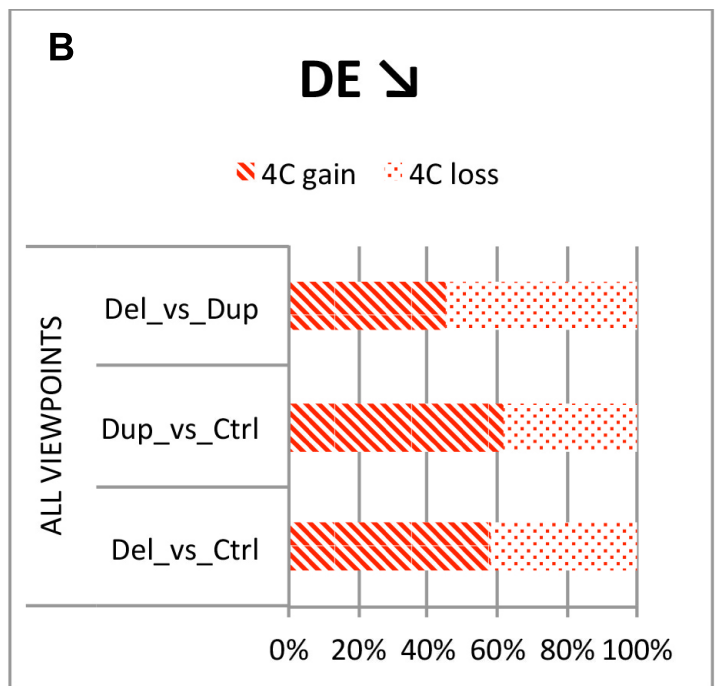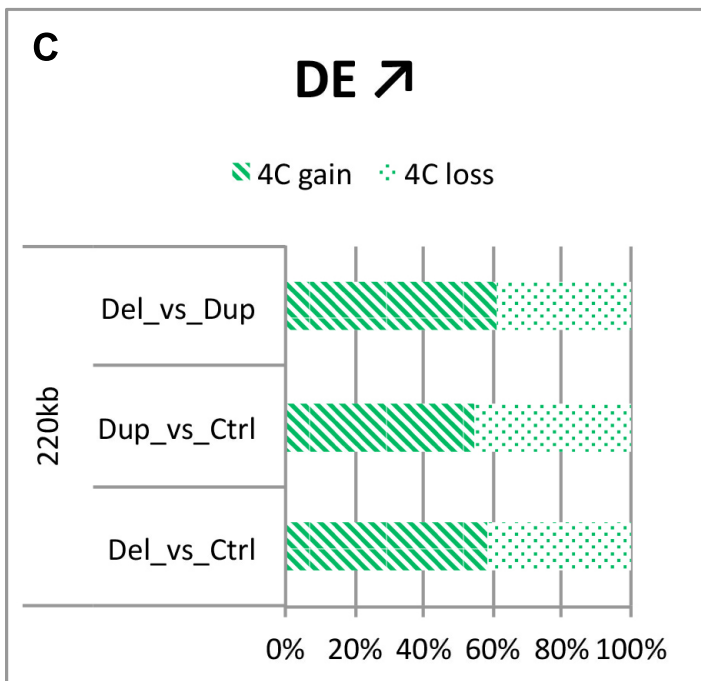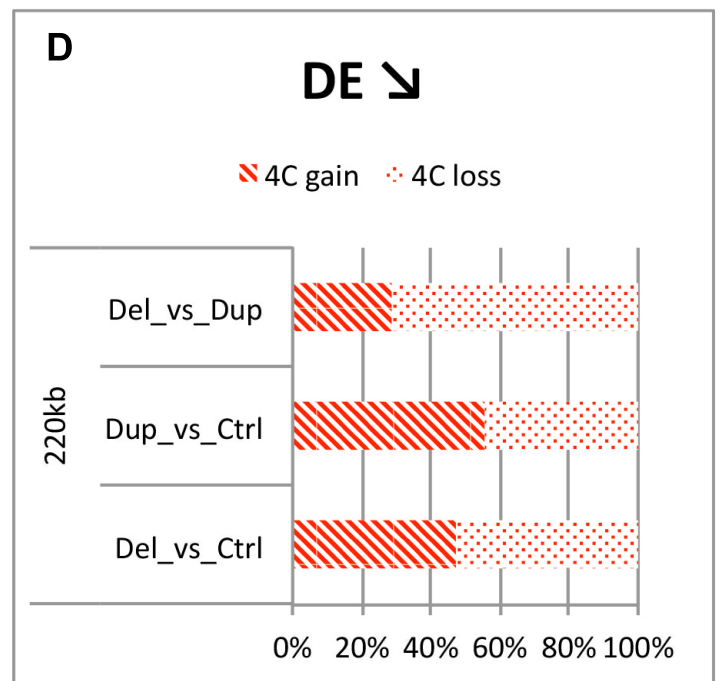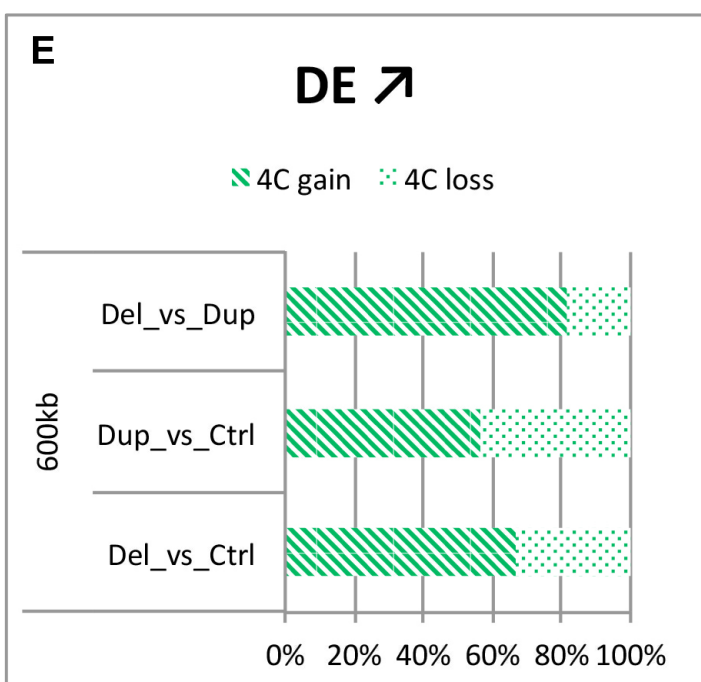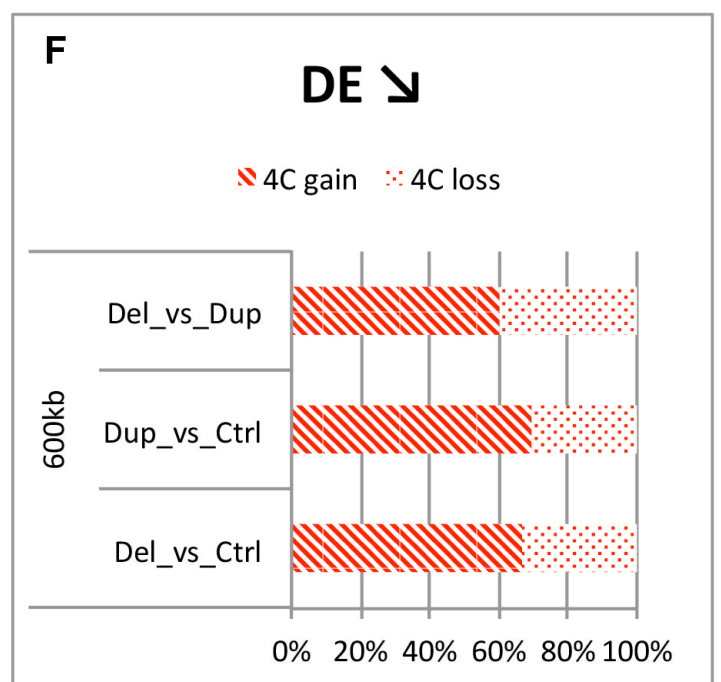

**Figure S7 : 4C contacts perturbation and gene differential expression**

Distribution of gain / loss of contacts for up- and down-regulated genes for each comparison: Deletion (Del) vs. Duplication (Dup), Dup vs. Control (Ctrl) and Del vs. Ctrl. Panels (A) and (B) show up-/down-regulated genes with altered BRICKS found in all viewpoints, panels (C) and (D) in the 220kb viewpoints only, and panels (E) and (F) in the 600kb viewpoints only.

chr1

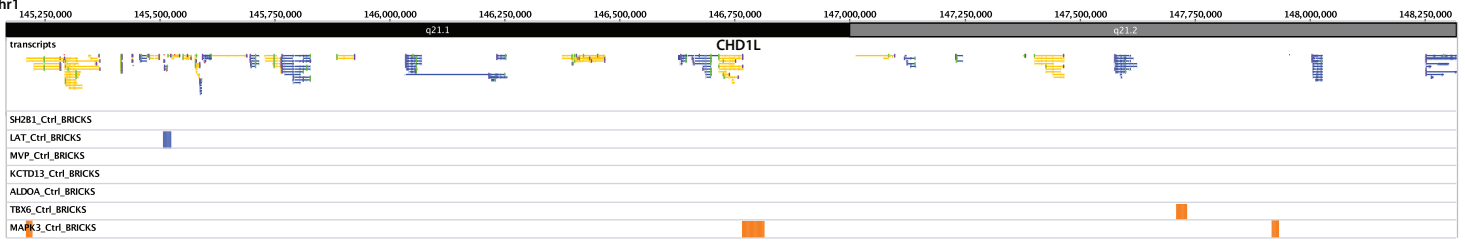

chr22

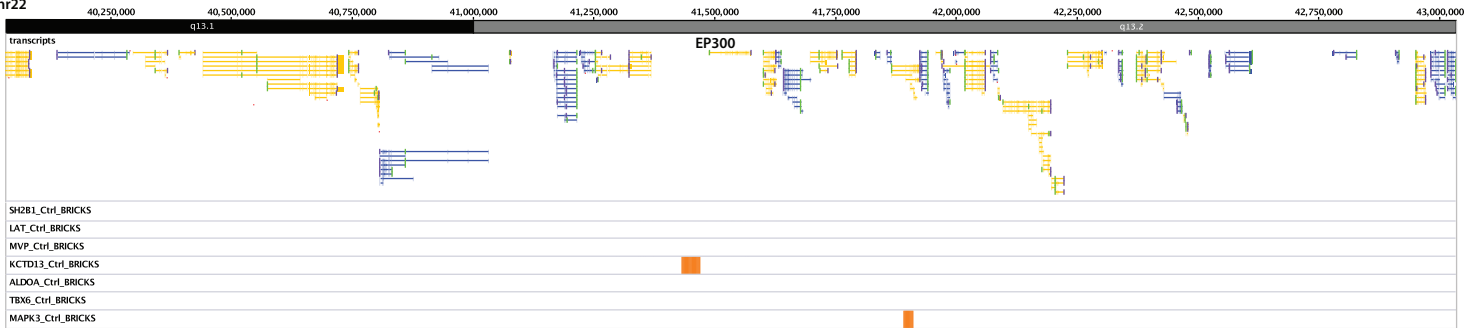

**Figure S8: Chromatin-interacting regions**

Examples of regions (BRICKS) interacting with 16p11.2 viewpoints showing some of the interacting genes, i.e. CHD1L (A) and EP300 (B). Other examples are shown in Figure 4A.

**A****HiC in BRICKS**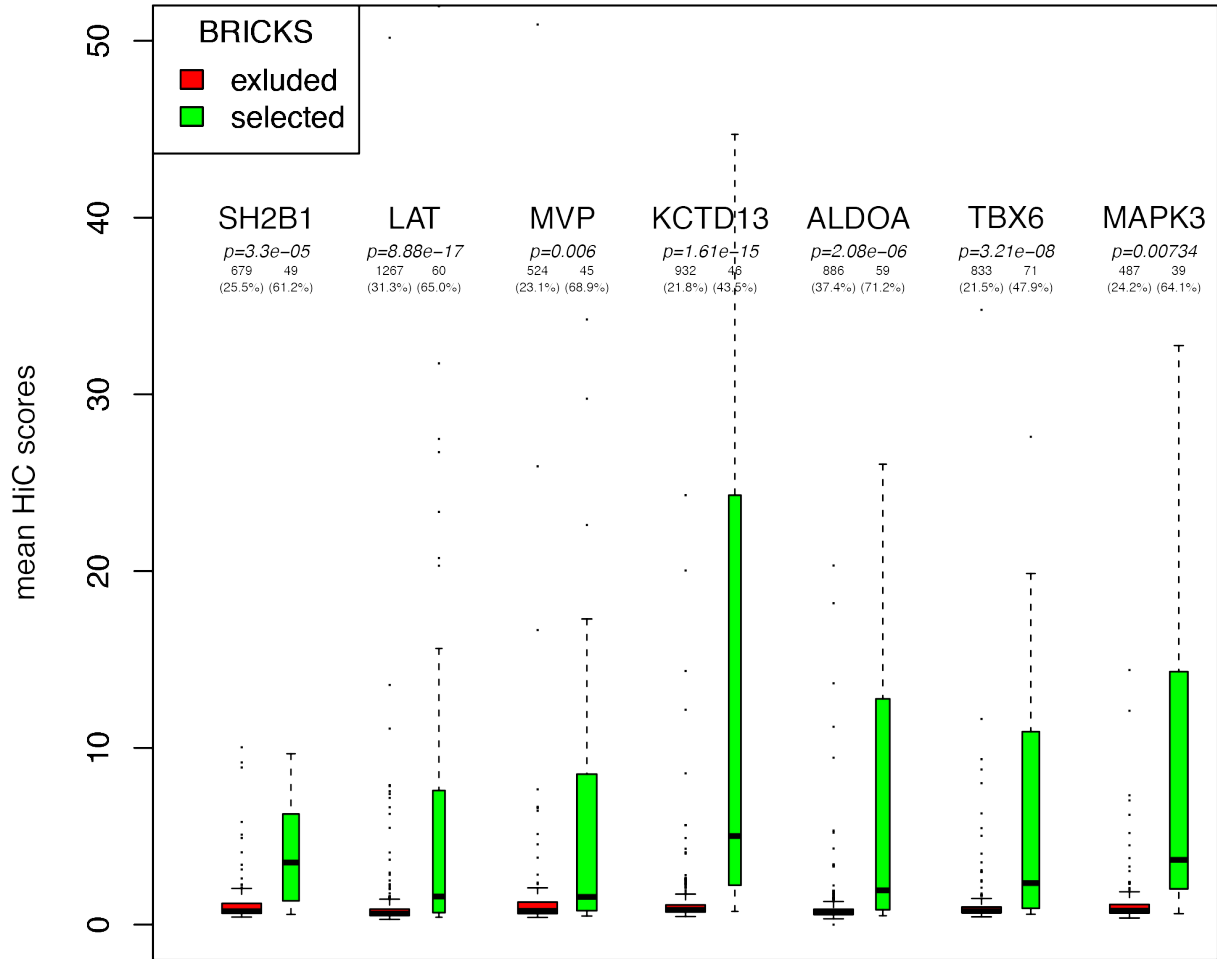**B****HiC in BRICKS  
O/E scores**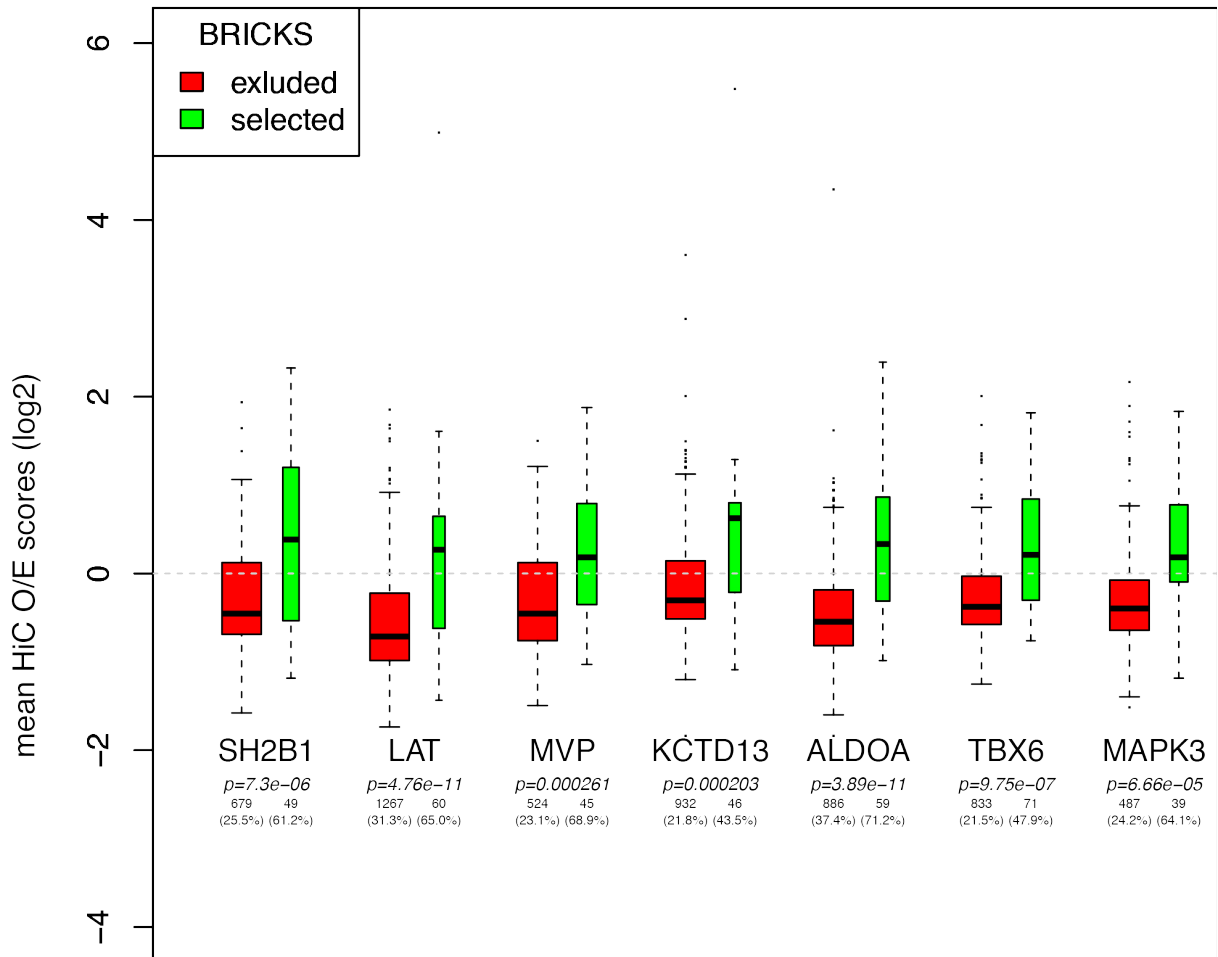

**Figure S9: Distribution of Hi-C scores in selected versus non-selected BRICKS**

Virtual 4C-seq tracks were generated for each viewpoint from the GM12878 Hi-C results of reference 70 (5kb resolution) by extracting the Hi-C vectors from the KR normalized observed (top panel) and observed/expected matrices (bottom panel). BRICKS found with each viewpoint were quantified by the mean Hi-C signals. The p-values of two-sided t-tests are reported for each comparison, together with the number of Hi-C bins and the % of non-NA bins.

**AXON GUIDANCE**

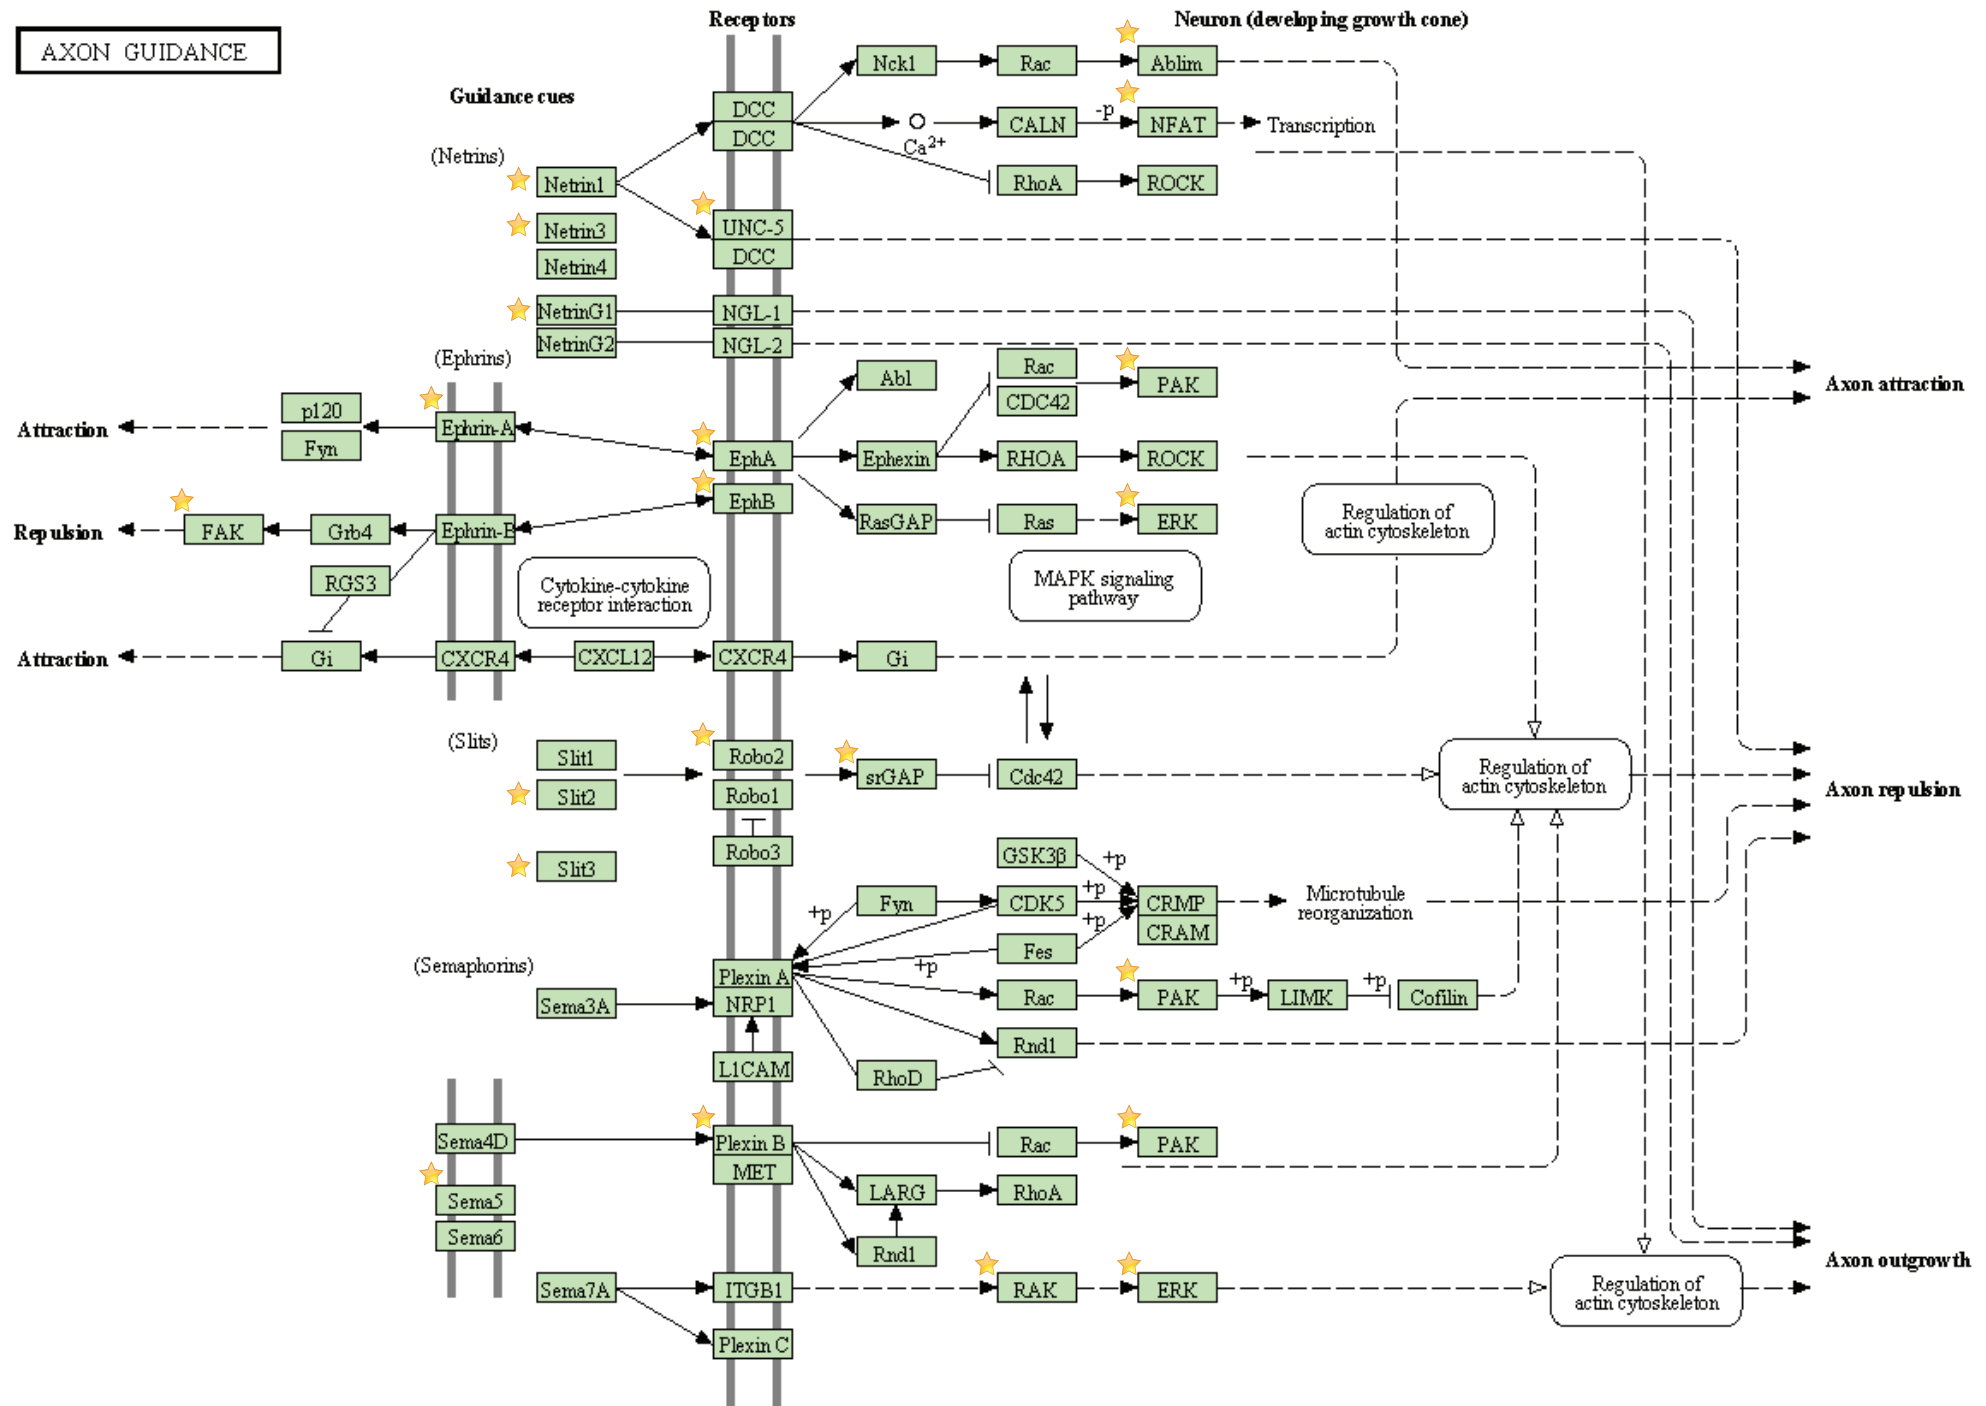

**Figure S10: KEGG pathway with modified chromatin interactions**

The 1193 genes that show modified chromatin interaction in cells of 16p11.2 600kb rearrangement carriers are enriched in members of the hsa04360 “axon guidance” KEGG pathway. The genes with modified chromatin interactions are marked with yellow stars.



# mTOR SIGNALING PATHWAY

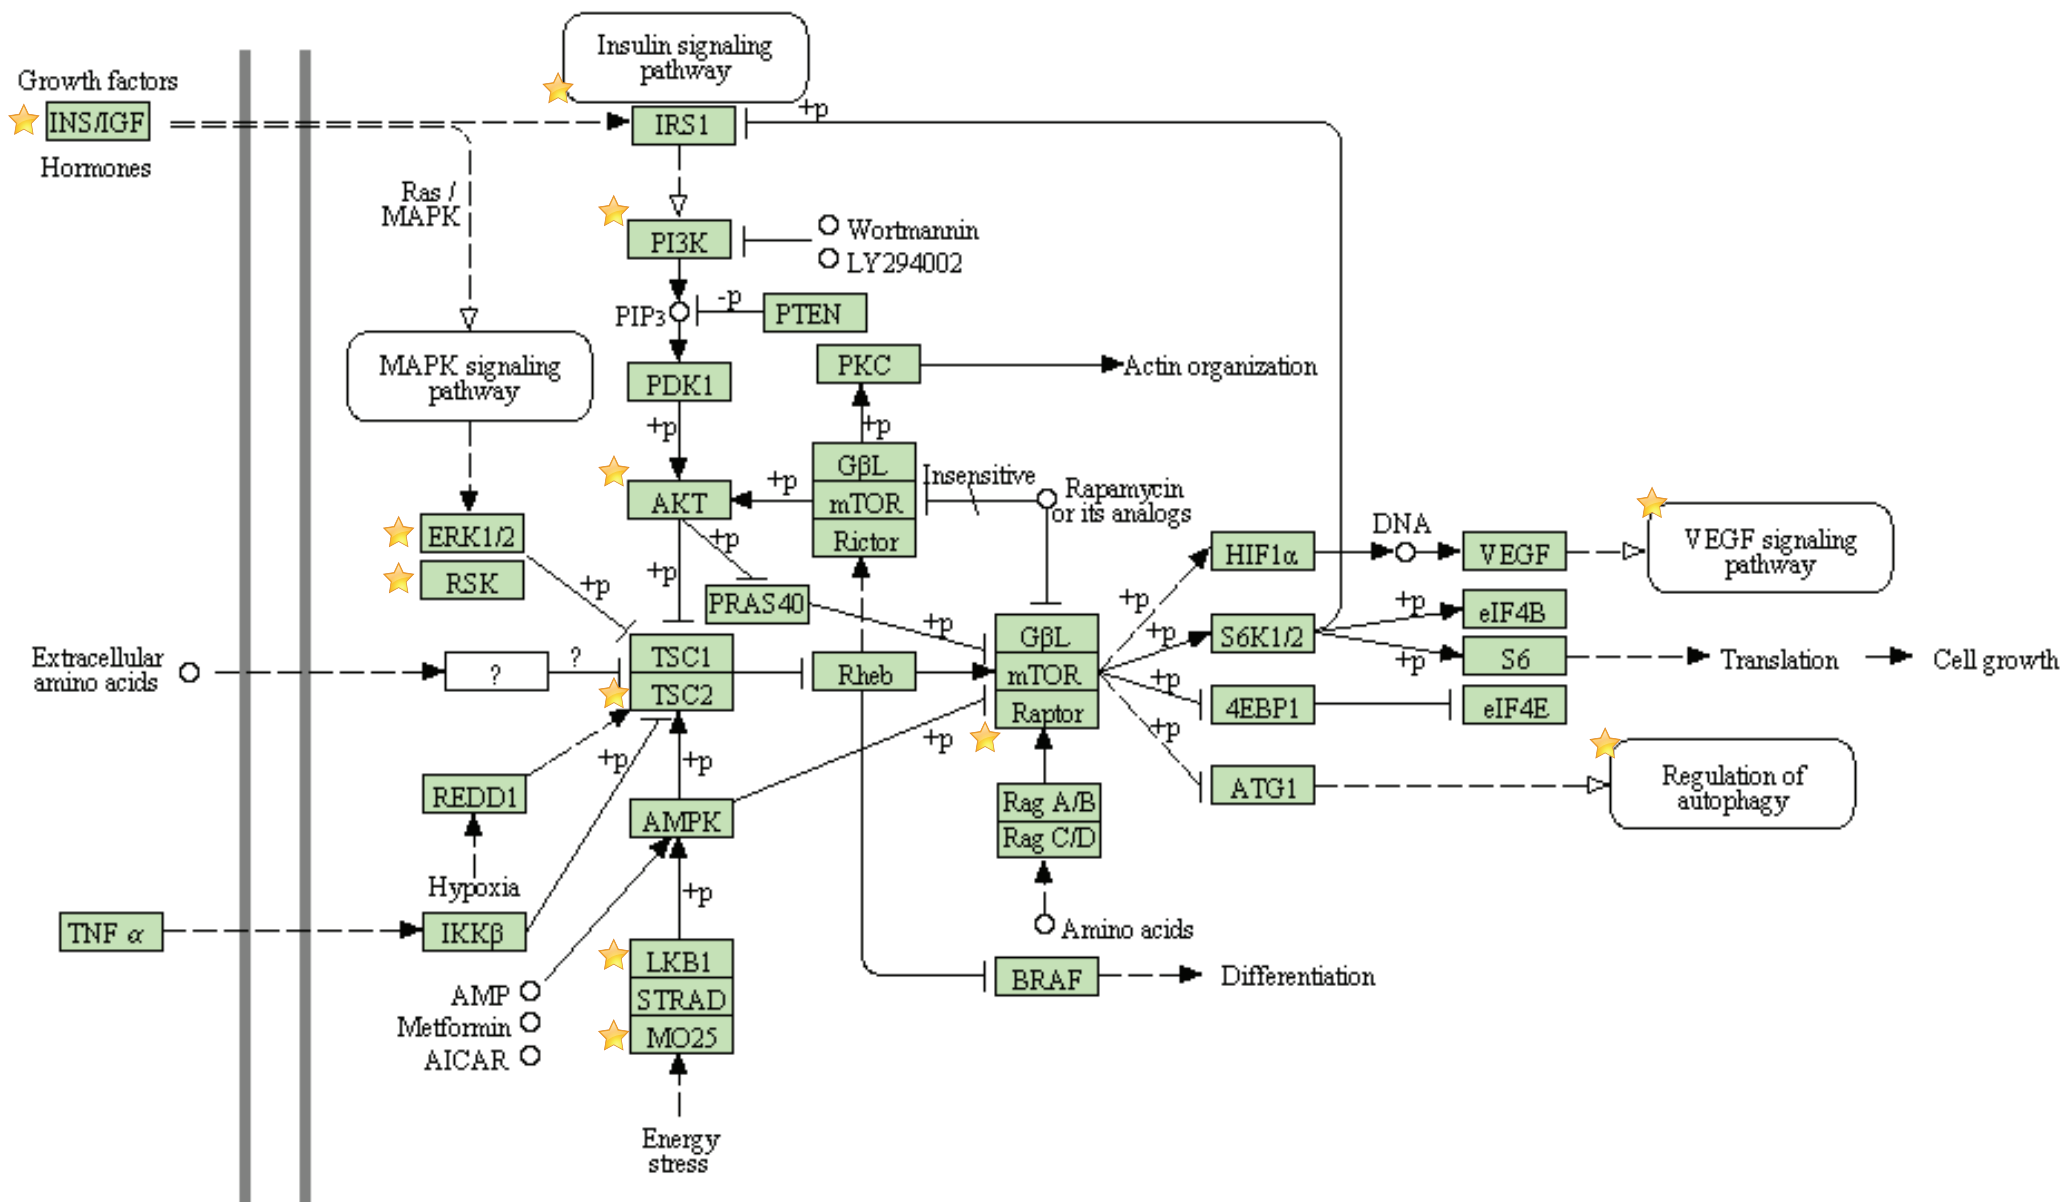

**Figure S11: KEGG pathway with modified chromatin interactions**

The 1193 genes that show modified chromatin interaction in cells of 16p11.2 600kb rearrangement carriers are enriched in members of the hsa04150 “mTOR signaling” KEGG pathway. The genes with modified chromatin interactions are marked with yellow stars.
